# Supplementary material
Source: Springer Nature journal article supplement (https://www.springermedizin.de/resource/supplementary/12895_2014_165_MOESM2_ESM.pdf/9514252)

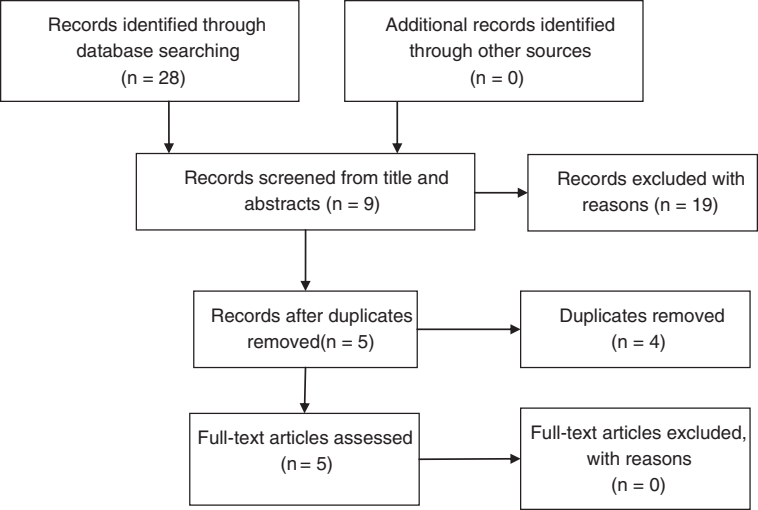

Supplement: MOESM2 [file 9514252]
